# Supplementary material for: Protein Sources Alternative to Meat: State of the Art and Involvement of Fermentation
Source: MDPI journal article supplement (doi:10.3390/foods11142065), 2022-07-12
Supplement: s1 [file s1]

**Table S1.** Comparison of some mushroom compositions (data adapted from [52–55]). \* N=Negligible

| Origin                    | Water (%) | Proteins (%) | Lipids (%) | Carbohydrates (%) | Dietary fibre (%) | Minerals (mg/100 g) | Vitamins (mg/100 g) | Energy (kcal in 100 g) |
|---------------------------|-----------|--------------|------------|-------------------|-------------------|---------------------|---------------------|------------------------|
| <b>penny bun</b>          | 92–95     | 4–8          | 1.6–5.2    | 1.5–2.5           | 0.45–1            | 7–9                 | 25–34               | 25–35                  |
| <b>champignon</b>         | 85–90     | 2.7–4.8      | 0.1–0.3    | 4–6               | 1–4               | 590–700             | 7–8                 | 20–40                  |
| <b>golden chanterelle</b> | 91–95     | 2.6–3.2      | 0.7–0.9    | 3–5               | 1–2               | 70–90               | 5.4–6.2             | 23–28                  |
| <i>Pleurotus spp.</i>     | 85–95     | 2.2–2.8      | 0.2–0.4    | 4–6               | 3–6               | 930–990             | 33.2–65             | 28–32                  |
| <b>Caesar's mushroom</b>  | 88–93     | 2–3          | 0.2–0.4    | N *               | 2                 | 110–120             | 7–9                 | 11.14                  |
| <b>Truffles</b>           | 85        | 4.5          | 0.09–2.3   | 0.17–0.36         | 8–15              | 99–115              | 3.4.2               | 37–41.1                |

**Table S2.** Fatty acids (% of total fatty acids) profile of different microalgae.

| Species                               | C16:0 | C18:0 | Σ SFA | C16:1 | C18:1 | Σ MUFA | C18:2 LA | C18:3n-3 ALA | C18:4n-3 | C20:5n-3 EPA | C22:6n-3 DHA | Σ PUFA | Ref. |
|---------------------------------------|-------|-------|-------|-------|-------|--------|----------|--------------|----------|--------------|--------------|--------|------|
| <i>Arthrospira platensis</i>          | 47.7  | 12.5  | 60.1  | -     | 6.3   | 6.3    | 10.4     | -            | -        | -            | -            | 10.4   | [83] |
| <i>Spirulina maxima</i>               | 57.0  | 2.1   | 59.1  | 2.2   | 6.0   | 8.2    | 16.0     | 1.3          |          |              |              | 32.7   | [88] |
| <i>Spirulina sp</i> LEB 18            | 45.4  | 3.2   | 48.6  | 4.1   | 8.1   | 12.2   | 15.5     | 13.1         |          |              |              | 28.6   | [83] |
| <i>Aphanizomenon flosaquae</i> *      | 36.6  | 2.7   | 39.3  | 11.9  | 6.7   | 18.6   | 7.4      | 22.3         | 0.65     | 0.1          |              | 30.4   | [89] |
| <i>Heterochlorella luteoviridis</i> * | 40.9  | 4.8   | 45.7  | 1.7   | 4.6   | 6.3    | 18.5     | 12.4         |          | 2.6          | 1.0          | 34.5   | [90] |
| <i>Chlorella pyrenoidosa</i>          | 22.2  | 0.9   | 23.1  | 0.3   | 1.2   | 1.5    | 13.34    | 48.2         |          | 5.4          |              | 66.9   | [91] |
| <i>Chlorella vulgaris</i>             | 20.2  | 3.0   | 23.2  | 0.7   | 12.0  | 12.7   | -        | 18.3         | -        | 0.9          | 0.5          | 19.6   | [89] |
| <i>Chlamydomonas mexicana</i>         | 35.1  | 1.1   | 36.2  | 1.0   | 6.7   | 7.7    | 40.9     | 14.3         | -        | -            | -            | 55.2   | [89] |
| <i>Odontella aurita</i>               | 13.7  | 2.2   | 15.9  | 22.5  | 10.1  | 32.6   | 0.7      | 0.8          | 1.3      | 25.6         | 3.8          | 32.2   | [92] |
| <i>Schizochytrium sp.</i> *           | 32.2  | 24.0  | 56.2  | 3.8   | 1.1   | 4.9    |          |              |          | 1.3          | 23.2         | 24.4   | [98] |
| <i>Tetraselmis chui</i>               | 0.3   | 3.1   | 3.4   | 3.6   | 9.8   | 13.4   | 4.6      | 25.2         | 6.1      | 8.0          |              |        | [93] |
| <i>Tetraselmis sp. CTP4</i>           | 15.3  | 0.5   | 15.8  | 1.9   | 11.8  | 13.7   | 5.3      | 18.8         | 4.9      | 3.7          | -            | 32.7   | [94] |
| <i>Dunaliella salina</i>              | 9.8   | 3.1   | 12.9  | 14.7  | 8.0   | 22.7   | 4.9      | 12.9         | -        | -            | 15.4         | 33.1   | [89] |
| <i>Nannochloropsis oculata</i>        | 18.4  | -     | 18.4  | 26.1  | 3.0   | 29.1   | 6.2      | -            | -        | 34.0         | -            | 40.2   | [89] |
| <i>Tisochrysis lutea</i>              | 14.4  | 0.3   | 14.7  | 20.5  | 15.2  | 35.7   | 12.1     | -            | -        | 2.8          | 12.7         | 27.5   | [89] |
| <i>Haematococcus pluvialis</i>        | 4.4   | 2.2   | 6.6   | 0.3   | 16.1  | 16.4   | 7.0      | 21.2         |          | 3.5          |              | 31.7   | [89] |
| <i>Scenedesmus sp.</i>                | 20.5  | 0.8   | 21.2  | 19.0  | 0.9   | 19.9   | 10.3     | 39.3         | -        | -            | -            | 49.6   | [89] |

\* Microalgae inserted in the EU Novel Food Catalogue.
